# Supplementary material for: Pigment Identification and Gene Expression Analysis during Erythrophore Development in Spotted Scat (Scatophagus argus) Larvae
Source: MDPI journal article supplement (doi:10.3390/ijms242015356), 2023-10-19
Supplement: s1 [file s1]

## Supplementary Materials

**Table S1.** Primers for qRT-PCR validation.

| Gene Name     | Primer Sequence (5' - 3')                     | Product Size (bp) |
|---------------|-----------------------------------------------|-------------------|
| <i>soat2</i>  | CGGTCATGCTGGTGACCATA<br>ACTGAGCTGATCCTGGACCT  | 112               |
| <i>rlbp1b</i> | CCCTGGTACTTCACCACCAC<br>GCCATCGTACTTGGGAGCTT  | 165               |
| <i>rbp1</i>   | CTGTCTGGAGTGGATGACAGG<br>GGTCCAGCCTCTTCCTTCAA | 102               |
| <i>apoa1</i>  | GTCAAGCTGGAGCCCGTAAT<br>AGGGACTTGCCATCTGCTTC  | 148               |
| <i>rpe65a</i> | GACTGCTTCGAGTCCAACGA<br>CAATGGCTGCCCCCTTTGAAC | 100               |
| <i>rh2</i>    | AGGTACCTTCCTGAGGGCAT<br>CGGGAACGAAGAAGTGGACA  | 118               |

**Table S2.** Primers for candidate genes of red coloration.

| Gene Name       | Primer Sequence (5'-3')                       | Product Size (bp) |
|-----------------|-----------------------------------------------|-------------------|
| <i>plin2</i>    | TGGGTTCACTGTCCACCAAG<br>CACACCACCAGGGAGCTAAG  | 112               |
| <i>scarb1</i>   | TTGAGCCGTCGATGTCTGTC<br>CAACAACCGCAACACGTAGG  | 113               |
| <i>bco1</i>     | CTGTCTGGAGTGGATGACAGG<br>GGTCCAGCCTCTTCCTTCAA | 132               |
| <i>plin6</i>    | CGTTACCCTTTGCTGGGTCT<br>AACCATCACCTCGTCTGCTG  | 204               |
| <i>csf1ra</i>   | CTTCAGTGGAATGGAGGCGT<br>CGTCTGTGTTTGGGTAGCCT  | 151               |
| <i>gch2</i>     | GGGCTATCACGAGACCATCG<br>TTGAACCTGAAGCCTCCGAC  | 226               |
| <i>slc2a15b</i> | GCAGGAATCCCACAACCGTA<br>ACGCTGATGTAACGCAGGAA  | 212               |
| <i>apoda</i>    | CCCTCCGTTCAATCAGCCTT<br>ATTTCCGAGCTGACCACTCG  | 152               |

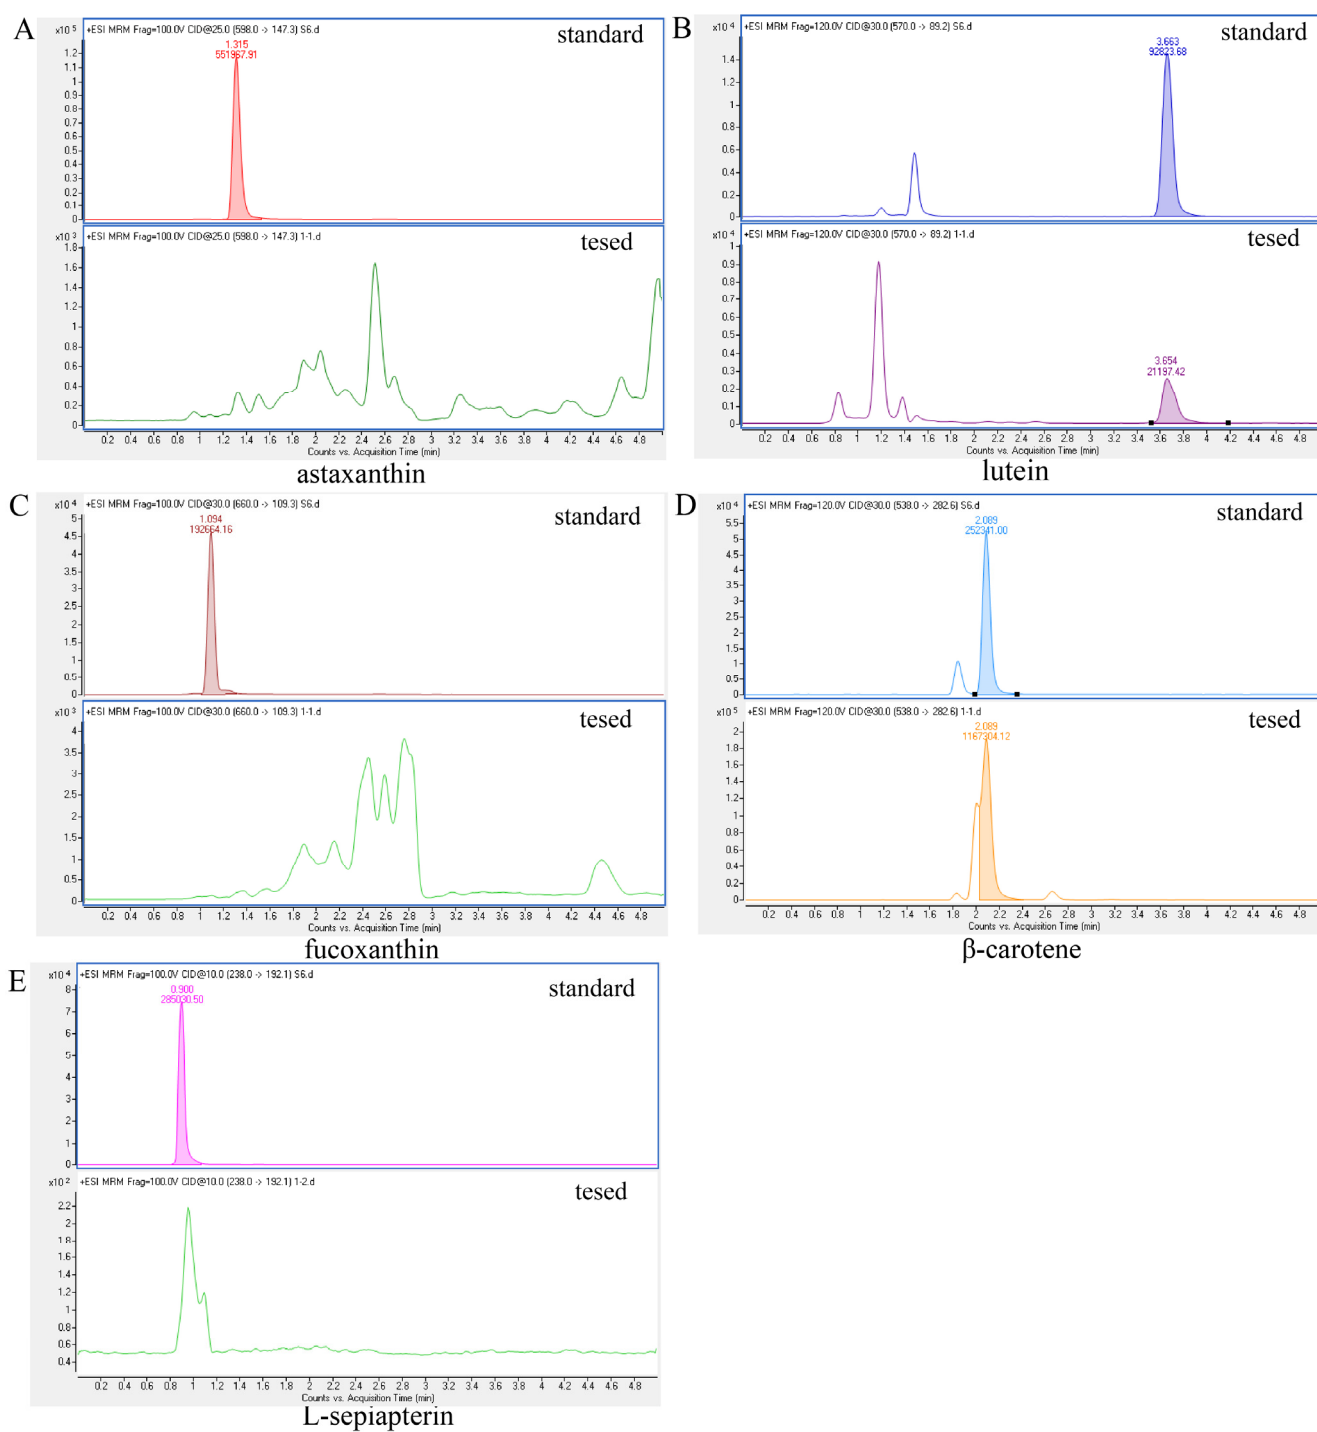

**Figure 1.** Pigments detected by LC-MS. Identification of pigment types responsible for the red coloration by LC-MS. “Standard” refers to the pigment standards, and “Test” represents the spotted scat larvae sample. **A** represents astaxanthin, **B** represents lutein, **C** represents fucoxanthin, **D** represents  $\beta$ -carotene, **E** represents L-sepiapterin.
